# Supplementary material for: Human biodistribution and radiation dosimetry of the 5-HT2A receptor agonist Cimbi-36 labeled with carbon-11 in two positions
Source: EJNMMI Res. 2019 Jul 31;9:71. doi: 10.1186/s13550-019-0527-4 (PMC6669221; doi:10.1186/s13550-019-0527-4)
Supplement: Supplementary file 1 — TIAC values. (XLSX 30 kb) [file 13550_2019_527_MOESM1_ESM.xlsx]

## Sheet: Ark1
AUC (kBq/mL x min)								Organ mass F	Organ mass M	Cumulated activity (kBq x min)									TIACs (h)							TIACs caled to individual body mass (h)									Average TIACs (h) inserted into Olinda
	1	2	3	4	5	6	7				1	2	3	4	5	6	7		1	2	3	4	5	6	7		1	2	3	4	5	6	7		Cimbi-36	Cimbi-36_5
																		ID (MBq)	607	584.5	583.3	567.139	575.845	603.4	570.9	Body mass (kg)	81	79	67	72	59	75	57
Whole body								58	73.7																	Ratio	1.39655	1.07191	1.15517	0.976934	1.01724	1.2931	0.982759
Organ
(+extrapolation)
Brain	673.7	507.5	705.7	537.2	671.5	595.6	658.9	1200	1420		808440	720650	846840	762824	805800	714720	790680		0.0221977	0.0205313	0.0242093	0.0224228	0.023316	0.0197546	0.0230788		0.0310002	0.0220078	0.0279659	0.0219056	0.023718	0.0255447	0.0226809		0.0242625	0.0267553
	13.9	10.0765	12.6471	10.6794	12.0382	11.6824	19				825120	734959	862016	777989	820246	728739	813480		0.0226557	0.020939	0.0246431	0.0228686	0.023734	0.020142	0.0237443		0.0316398	0.0224448	0.0284671	0.0223411	0.0241432	0.0260457	0.0233349		0.0247808	0.0272564
Thyroid	863.2	538.6	656.5	642.7	842.2	726.2	563.4	17	20.7		14674.4	11149	11160.5	13303.9	14317.4	12345.4	9577.8		0.000402921	0.000317636	0.000319054	0.000391061	0.000414277	0.000341222	0.000279562		0.000562701	0.000340478	0.000368562	0.00038204	0.000421419	0.000441235	0.000274742		0.000396276	0.000404899
	5.88235	3.23529	3.82353	4.11765	5.58824	2.40735	5.44118				14774.4	11216	11225.5	13389.1	14412.4	12386.3	9670.3		0.000405667	0.000319544	0.000320912	0.000393566	0.000417025	0.000342353	0.000282262		0.000566535	0.000342523	0.000370709	0.000384488	0.000424216	0.000442698	0.000277396		0.000399032	0.000406703
Lungs	1182	783.3	772	1063	1426	1277	1012	800	1000		945600	783300	617600	1063000	1140800	1021600	809600		0.0259638	0.0223162	0.0176558	0.0312463	0.0330093	0.0282366	0.0236311		0.0362597	0.0239211	0.0203955	0.0305256	0.0335784	0.0365128	0.0232236		0.0295017	0.0284542
	10.3977	5.88235	5.58824	9.41176	12.3529	8.99446	13.6765				953918	789182	622071	1.07241e+06	1.15068e+06	1.0288e+06	820541		0.0261922	0.0224838	0.0177836	0.031523	0.0332952	0.0284355	0.0239504		0.0365787	0.0241007	0.0205431	0.0307959	0.0338693	0.03677	0.0235375		0.0297764	0.0286566
Heart lumen	295.9	270.3	347.7	284.9	291.3	333.2	379.2	410	454		121319	122716	142557	129345	119433	136612	155472		0.00333111	0.00349619	0.00407539	0.00380202	0.00345582	0.0037759	0.004538		0.00465207	0.00374761	0.00470777	0.00371432	0.0035154	0.00488263	0.00445976		0.00401783	0.0047952
	5.15	2.63529	4.11765	5.21765	4.53235	2.92059	4.40588				123430	123913	144245	131713	121291	137809	157278		0.00338909	0.00353027	0.00412365	0.00387165	0.00350959	0.003809	0.00459073		0.00473303	0.00378415	0.00476353	0.00378234	0.0035701	0.00492542	0.00451158		0.00407624	0.00484447
Heart wall	859.2	831	872.3	814.6	1033	799.4	1384	240	316		206208	262596	209352	257414	247920	191856	332160		0.00566194	0.00748137	0.00598491	0.00756654	0.00717361	0.00530282	0.00969527		0.0079072	0.00801938	0.0069136	0.007392	0.00729729	0.00685709	0.00952811		0.0080288	0.00688535
	5.77941	3.59706	6.47059	4.95882	8.27353	3.67353	11.5				207595	263733	210905	258981	249906	192738	334920		0.00570003	0.00751375	0.0060293	0.0076126	0.00723107	0.00532719	0.00977583		0.00796039	0.00805409	0.00696488	0.007437	0.00735574	0.0068886	0.00960728		0.0080829	0.00692674
Liver	1400	1060	1646	1992	1131	801.2	1490	1400	1910		1960000	2024600	2304400	3804720	1583400	1121680	2086000		0.0538166	0.0576809	0.0658776	0.111838	0.045816	0.0310028	0.0608873		0.0751576	0.0618289	0.0761	0.109258	0.0466059	0.0400898	0.0598376		0.0705376	0.0580949
	30.5882	14.3912	31.4706	33.7588	16.1971	14.5794	26.4706				2.00282e+06	2.05209e+06	2.34846e+06	3.8692e+06	1.60608e+06	1.14209e+06	2.12306e+06		0.0549924	0.058464	0.0671372	0.113733	0.0464721	0.0315669	0.061969		0.0767997	0.0626684	0.077555	0.11111	0.0472733	0.0408193	0.0609006		0.0717503	0.0591872
Spleen	1770	1480	1700	1550	2113	1647	2065	150	183		265500	270840	255000	283650	316950	247050	309750		0.00728995	0.00771624	0.00728988	0.00833774	0.00917101	0.00682836	0.00904116		0.0101808	0.00827114	0.00842107	0.00814542	0.00932913	0.00882977	0.00888527		0.00896235	0.00862542
	15.5559	11.25	13.2353	12.35	14.8706	13.8235	16.5706				267833	272899	256985	285910	319181	249124	312236		0.00735402	0.00777489	0.00734664	0.00840418	0.00923555	0.00688567	0.00911371		0.0102703	0.00833401	0.00848663	0.00821032	0.00939478	0.00890388	0.00895657		0.00903319	0.00869526
Kidneys	994.4	1151	1101	968.6	1293	859.9	1550	275	299		273460	344149	302775	289611	355575	236472	426250		0.00750851	0.00980481	0.00865566	0.00851297	0.0102886	0.006536	0.0124416		0.010486	0.0105099	0.00999878	0.00831661	0.010466	0.00845172	0.0122271		0.0104011	0.00922525
	15.2941	13.2353	7.94118	11.4706	15	6.18571	31.5487				277666	348106	304959	293041	359700	238174	434926		0.00762399	0.00991756	0.00871809	0.00861379	0.010408	0.00658302	0.0126949		0.0106473	0.0106308	0.0100709	0.0084151	0.0105874	0.00851252	0.012476		0.0105513	0.00929171
Bone	71.33	60.87	75.87	65.67	62.08	130.6	91.36	3000	4000		213990	243480	227610	262680	186240	391800	274080		0.00587562	0.00693675	0.00650686	0.00772134	0.00538889	0.0108292	0.008		0.0082056	0.0074356	0.00751655	0.00754324	0.0054818	0.0140033	0.00786207		0.00730566	0.0107599
	1.17647	1.47059	1.47059	0.882353	1.17647	1.84898	2.55177				217519	249362	232022	266209	189769	397347	281735		0.00597253	0.00710434	0.00663298	0.00782509	0.00549101	0.0109825	0.00822345		0.00834094	0.00761524	0.00766224	0.00764459	0.00558569	0.0142015	0.00808166		0.00745362	0.0109319
Pancreas	2005	1491	1627	1824	1959	1386	2106	85	94.3		170425	140601	138295	172003	166515	117810	179010		0.00467943	0.00400574	0.00395354	0.00505594	0.00481814	0.00325622	0.00522504		0.00653507	0.0042938	0.00456703	0.00493932	0.00490121	0.00421063	0.00513496		0.00516087	0.00438883
	13.9912	14.1588	11.1765	18.3265	20.8647	11.1912	23.6971				171614	141936	139245	173731	168288	118761	181024		0.00471209	0.00404377	0.0039807	0.00510674	0.00486946	0.00328251	0.00528384		0.00658067	0.00433457	0.0045984	0.00498895	0.00495342	0.00424463	0.00519274		0.00521007	0.00442151
Stomach contents	621.6	676.9	157.9	236.3	195.5	1501	221.7	230	260		142968	175994	36317	61438	44965	345230	50991		0.00392554	0.00501407	0.00103822	0.00180594	0.00130107	0.00954201	0.00148835		0.00548221	0.00537465	0.00119933	0.00176428	0.0013235	0.0123388	0.00146269		0.00308147	0.00676907
	12.8647	16.6176	7.05882	13.0324	9.60294	5.95294	17.1794				145927	180315	37940.5	64826.4	47173.7	346599	54942.3		0.00400678	0.00513717	0.00108463	0.00190554	0.00136498	0.00957986	0.00160369		0.00559567	0.0055066	0.00125294	0.00186158	0.00138851	0.0123877	0.00157604		0.00318568	0.00682034
Stomach wall	802.2	1090	461.1	457.9	543.6	509.2	802.2	140	158		112308	172220	64554	72348.2	76104	71288	112308		0.00308369	0.00490655	0.00184545	0.00212664	0.00220208	0.00197037	0.00327811		0.00430653	0.0052594	0.00213182	0.00207758	0.00224005	0.00254789	0.00322159		0.00342103	0.00233986
	7.88824	12.2324	9.70588	6.74118	6.35882	7.17941	12.8618				113412	174153	65912.8	73413.3	76994.2	72293.1	114109		0.00311401	0.00496162	0.0018843	0.00215795	0.00222784	0.00199815	0.00333067		0.00434888	0.00531842	0.00217669	0.00210817	0.00226625	0.00258382	0.00327324		0.00346299	0.00238025
Small intestines proximal	602.3	1036	927.4	1171	1399	525.7	704	200	220		120460	227920	185480	257620	279800	105140	140800		0.00330752	0.00649345	0.00530246	0.0075726	0.00809606	0.00290603	0.00410975		0.00461913	0.00696041	0.00612525	0.00739793	0.00823565	0.00375779	0.00403889		0.0062504	0.00494152
	9.34706	17.9	21.1765	26.5647	37.95	8.60588	23.4588				122329	231858	189715	263464	287390	106861	145492		0.00335885	0.00660564	0.00542354	0.00774439	0.00831568	0.0029536	0.00424669		0.00469081	0.00708067	0.00626512	0.00756576	0.00845906	0.00381931	0.00417348		0.00639395	0.00504221
Large intestines	252.5	264	348.7	224.6	324.1	217.1	179	160	167		40400	44088	55792	37508.2	51856	34736	28640		0.00110928	0.00125607	0.00159497	0.00110253	0.00150046	0.000960088	0.00083596		0.00154917	0.0013464	0.00184246	0.0010771	0.00152633	0.00124149	0.000821547		0.00126411	0.00154198
	7.16176	7.55294	6.47059	3.5	16.8794	3.81765	2.16765				41545.9	45349.3	56827.3	38092.7	54556.7	35346.8	28986.8		0.00114074	0.001292	0.00162457	0.00111971	0.00157861	0.000976971	0.000846084		0.00159311	0.00138492	0.00187665	0.00109389	0.00160583	0.00126333	0.000831496		0.00130185	0.00156999
Bone marrow	497.1	488.2	594.9	562	411.3	368.6	392	1050	1120		521955	546784	624645	629440	431865	387030	411600		0.0143315	0.0155779	0.0178572	0.0185021	0.0124961	0.0106973	0.012014		0.0200147	0.0166981	0.0206281	0.0180753	0.0127115	0.0138328	0.0118069		0.0158613	0.0172305
	11.5618	9.03235	12.0588	13.8382	9.20882	6.33824	7.79412				534095	556900	637307	644939	441534	393685	419784		0.0146649	0.0158661	0.0182192	0.0189576	0.0127759	0.0108813	0.0122529		0.0204803	0.0170071	0.0210463	0.0185204	0.0129961	0.0140706	0.0120416		0.0162091	0.0175585
Gall bladder_new	1382	1001	1147	1923	1174	967.9	3177	8	10.7		11056	10710.7	9176	20576.1	9392	7743.2	25416		0.000303569	0.000305148	0.000262321	0.000604824	0.000271759	0.000214019	0.000741856		0.00042395	0.000327092	0.000303026	0.000590872	0.000276445	0.000276748	0.000729066		0.000469485	0.000289887
	153.126	154.532	45.5882	173.141	133.165	34.3147	196.865				12281	12364.2	9540.71	22428.7	10457.3	8017.72	26990.9		0.000337205	0.000352256	0.000272747	0.00065928	0.000302584	0.000221606	0.000787826		0.000470924	0.000377588	0.00031507	0.000644073	0.000307801	0.00028656	0.000774243		0.000514926	0.000300815
